# Supplementary material
Source: MDPI journal article supplement (https://www.mdpi.com/2072-4292/13/3/507)
Supplement: s1 [file s1]

Review

# Terrestrial laser scanning for vegetation analyses with a special focus on savannas

Tasiyiwa Priscilla Muumbe <sup>1, \*</sup>, Jussi Baade <sup>2</sup>, Jenia Singh <sup>3</sup>, Christiane Schmullius <sup>1</sup> and Christian Thau <sup>1,4</sup>

<sup>1</sup> Department for Earth Observation, Friedrich Schiller University Jena, 07743 Jena, Germany; c.schmullius@uni-jena.de (C.S.), christian.thau@uni-jena.de (C.T.)

<sup>2</sup> Department of Physical Geography, Friedrich Schiller University Jena, 07743 Jena; Germany; jussi.baade@uni-jena.de

<sup>3</sup> Department of Organismic and Evolutionary Biology, Harvard University, Cambridge, MA 02138, USA; jeniasingh@fas.harvard.edu

<sup>4</sup> Department for Urban Development and Environment, Jena City Administration, 07743 Jena, Germany

\* Correspondence: tasiyiwa.muumbe@uni-jena.de

## Supplementary Material

**Table S1.** Full List of Reviewed Research Articles.

| Author (s), Year          | Title                                                                                                                                                                  | Journal                                                                                               |
|---------------------------|------------------------------------------------------------------------------------------------------------------------------------------------------------------------|-------------------------------------------------------------------------------------------------------|
| 1. Aijazi et al., 2017    | Automatic detection and parameter estimation of trees for forest inventory applications using 3D terrestrial LiDAR                                                     | Remote Sensing                                                                                        |
| 2. Åkerblom et al., 2018  | Non-intersecting leaf insertion algorithm for tree structure models                                                                                                    | Interface Focus                                                                                       |
| 3. Anderson et al., 2018  | Estimating vegetation biomass and cover across large plots in shrub and grass dominated drylands using terrestrial lidar and machine learning                          | Ecological Indicators                                                                                 |
| 4. Bailey and Ochoa, 2018 | Semi-direct tree reconstruction using terrestrial LiDAR point cloud data                                                                                               | Remote Sensing of Environment                                                                         |
| 5. Bazezew et al., 2018   | Integrating Airborne LiDAR and Terrestrial Laser Scanner forest parameters for accurate above-ground biomass/carbon estimation in Ayer Hitam tropical forest, Malaysia | International Journal of Applied Earth Observation and Geoinformation                                 |
| 6. Béland et al., 2011    | Estimating leaf area distribution in savanna trees from terrestrial LiDAR measurements.                                                                                | Agricultural and Forest Meteorology                                                                   |
| 7. Beyer et al., 2017     | Validation of a functional-structural tree model using terrestrial Lidar data                                                                                          | Ecological Modelling                                                                                  |
| 8. Bordin et al., 2013    | Analysis of the Influence of Distance on Data Acquisition Intensity Forestry Targets By a Lidar Technique With Terrestrial Laser Scanner                               | ISPRS - International Archives of the Photogrammetry, Remote Sensing and Spatial Information Sciences |
| 9. Brede et al., 2019     | Non-destructive tree volume estimation through quantitative structure modelling: Comparing UAV laser scanning with terrestrial LIDAR                                   | Remote Sensing of Environment                                                                         |

| Author (s), Year         | Title                                                                                                                                                           | Journal                                                        |
|--------------------------|-----------------------------------------------------------------------------------------------------------------------------------------------------------------|----------------------------------------------------------------|
| 10. Bremer et al., 2018  | Multi-temporal fine-scale modelling of Larix decidua forest plots using terrestrial LiDAR and hemispherical photographs                                         | Remote Sensing of Environment                                  |
| 11. Burt et al., 2013    | Rapid characterisation of forest structure from TLS and 3D modelling                                                                                            | International Geoscience and Remote Sensing Symposium (IGARSS) |
| 12. Burt et al., 2019    | Extracting individual trees from lidar point clouds using treeSeg                                                                                               | Methods in Ecology and Evolution                               |
| 13. Calders et al., 2014 | Implications of sensor configuration and topography on vertical plant profiles derived from terrestrial LiDAR                                                   | Agricultural and Forest Meteorology                            |
| 14. Calders et al., 2015 | Nondestructive estimates of above-ground biomass using terrestrial laser scanning                                                                               | Methods in Ecology and Evolution                               |
| 15. Calders et al., 2016 | Large-area virtual forests from terrestrial laser scanning data                                                                                                 | International Geoscience and Remote Sensing Symposium (IGARSS) |
| 16. Calders et al., 2018 | Variability and bias in active and passive ground-based measurements of effective plant, wood and leaf area index                                               | Agricultural and Forest Meteorology                            |
| 17. Calders et al., 2018 | Realistic forest stand reconstruction from terrestrial LiDAR for radiative transfer modelling                                                                   | Remote Sensing                                                 |
| 18. Chen et al., 2019    | Nondestructive estimation of the above-ground biomass of multiple tree species in boreal forests of china using terrestrial laser scanning                      | Forests                                                        |
| 19. Cooper et al., 2017  | Examination of the potential of terrestrial laser scanning and structure-from-motion photogrammetry for rapid nondestructive field measurement of grass biomass | Remote Sensing                                                 |

| Author (s), Year                | Title                                                                                                                                                                        | Journal                                                                                      |
|---------------------------------|------------------------------------------------------------------------------------------------------------------------------------------------------------------------------|----------------------------------------------------------------------------------------------|
| 20. Côté et al., 2012           | A fine-scale architectural model of trees to enhance LiDAR-derived measurements of forest canopy structure                                                                   | Agricultural and Forest Meteorology                                                          |
| 21. Côté et al., 2018           | Fine-scale three-dimensional modeling of boreal forest plots to improve forest characterization with remote sensing                                                          | Remote Sensing of Environment                                                                |
| 22. Cuni-Sanchez et al., 2016   | African savanna-forest boundary dynamics: A 20-year study                                                                                                                    | PLoS ONE                                                                                     |
| 23. Danson et al., 2018         | Spectral and spatial information from a novel dual-wavelength full-waveform terrestrial laser scanner for forest ecology                                                     | Interface Focus                                                                              |
| 24. Decuyper et al., 2018       | Assessing the structural differences between tropical forest types using Terrestrial Laser Scanning                                                                          | Forest Ecology and Management                                                                |
| 25. Delagrange and Rochon, 2011 | Reconstruction and analysis of a deciduous sapling using digital photographs or terrestrial-LiDAR technology                                                                 | Annals of Botany                                                                             |
| 26. Errington et al., 2015      | Reflectance modelling using terrestrial LiDAR intensity data                                                                                                                 | IST 2015 - 2015 IEEE International Conference on Imaging Systems and Techniques, Proceedings |
| 27. Estornell et al., 2017      | Estimation of structural attributes of walnut trees based on terrestrial laser scanning                                                                                      | Revista de Teledeteccion                                                                     |
| 28. Fan et al., 2020            | A new quantitative approach to tree attributes estimation based on LiDAR point clouds                                                                                        | Remote Sensing                                                                               |
| 29. Fang & Strimbu, 2019        | Comparison of Mature Douglas-Firs' Crown Structures Developed with Two Quantitative Structural Models Using TLS Point Clouds for Neighboring Trees in a Natural Regime Stand | Remote Sensing                                                                               |

| Author (s), Year                     | Title                                                                                                                                                            | Journal                                                                    |
|--------------------------------------|------------------------------------------------------------------------------------------------------------------------------------------------------------------|----------------------------------------------------------------------------|
| 30. Ferrara et al., 2018             | An automated approach for wood-leaf separation from terrestrial LIDAR point clouds using the density based clustering algorithm DBSCAN                           | Agricultural and Forest Meteorology                                        |
| 31. Ghimire et al., 2017             | Using terrestrial laser scanning to measure forest inventory parameters in a Mediterranean coniferous stand of western Greece                                    | PFG - Journal of Photogrammetry, Remote Sensing and Geoinformation Science |
| 32. Gollob et al., 2019              | Influence of scanner position and plot size on the accuracy of tree detection and diameter estimation using terrestrial laser scanning on forest inventory plots | Remote sensing                                                             |
| 33. Gonzalez de Tanago et al., 2018  | Estimation of above-ground biomass of large tropical trees with terrestrial LiDAR                                                                                | Methods in Ecology and Evolution                                           |
| 34. Greaves et al., 2015             | Estimating aboveground biomass and leaf area of low-stature Arctic shrubs with terrestrial LiDAR                                                                 | Remote Sensing of Environment                                              |
| 35. Greaves et al., 2017             | Applying terrestrial lidar for evaluation and calibration of airborne lidar-derived shrub biomass estimates in Arctic tundra                                     | Remote Sensing Letters                                                     |
| 36. Grotti et al., 2020              | An intensity, image-based method to estimate gap fraction, canopy openness and effective leaf area index from phase-shift terrestrial laser scanning             | Agricultural and Forest Meteorology                                        |
| 37. Guimarães-Steinicke et al., 2019 | Terrestrial laser scanning reveals temporal changes in biodiversity mechanisms driving grassland productivity                                                    | Advances in Ecological Research                                            |
| 38. Hancock et al., 2017             | Measurement of fine-spatial-resolution 3D vegetation structure with airborne waveform lidar: Calibration and validation with voxelised terrestrial lidar         | Remote Sensing of Environment                                              |

| Author (s), Year             | Title                                                                                                                  | Journal                                                                                                        |
|------------------------------|------------------------------------------------------------------------------------------------------------------------|----------------------------------------------------------------------------------------------------------------|
| 39. Heinzel & Huber, 2016    | TLS field data based intensity correction for forest environments                                                      | International Archives of the Photogrammetry, Remote Sensing and Spatial Information Sciences - ISPRS Archives |
| 40. Heinzel & Huber, 2017    | Detecting tree stems from volumetric TLS data in forest environments with rich understory                              | Remote Sensing                                                                                                 |
| 41. Heinzel and Huber, 2017  | Tree stem diameter estimation from volumetric TLS image data                                                           | Remote Sensing                                                                                                 |
| 42. Indirabai et al., 2019   | Terrestrial laser scanner based 3D reconstruction of trees and retrieval of leaf area index in a forest environment    | Ecological Informatics                                                                                         |
| 43. Kaasalainen et al., 2011 | Analysis of incidence angle and distance effects on terrestrial laser scanner intensity: Search for correction methods | Remote Sensing                                                                                                 |
| 44. Kaasalainen et al., 2014 | Change detection of tree biomass with terrestrial laser scanning and quantitative structure modelling                  | Remote Sensing                                                                                                 |
| 45. Kato et al., 2014        | Efficient field data collection of tropical forest using terrestrial laser scanner                                     | International Geoscience and Remote Sensing Symposium (IGARSS)                                                 |
| 46. Kato et al., 2015        | Fusion between UAV-SFM and terrestrial laser scanner for field validation of satellite remote sensing                  | International Geoscience and Remote Sensing Symposium (IGARSS)                                                 |
| 47. Kelbe et al., 2013       | Reconstruction of 3D tree stem models from low-cost terrestrial laser scanner data                                     | Laser Radar Technology and Applications XVIII                                                                  |
| 48. Kelbe et al., 2015       | Single-scan stem reconstruction using low-resolution terrestrial laser scanner data                                    | IEEE Journal of Selected Topics in Applied Earth Observations and Remote Sensing                               |
| 49. Kim et al., 2016         | Simulated full-waveform lidar compared to Riegl VZ-400 terrestrial laser scans                                         | Laser Radar Technology and Applications XXI                                                                    |

| Author (s), Year         | Title                                                                                                                                             | Journal                                                        |
|--------------------------|---------------------------------------------------------------------------------------------------------------------------------------------------|----------------------------------------------------------------|
| 50. Kirton et al., 2009  | Detailed structural characterisation of the savanna flux site at Skukuza, South Africa                                                            | International Geoscience and Remote Sensing Symposium (IGARSS) |
| 51. Kong et al., 2015    | New hybrid algorithms for estimating tree stem diameters at breast height using a two dimensional terrestrial laser scanner                       | Sensors (Switzerland)                                          |
| 52. Krooks et al., 2014  | Tree structure vs. height from terrestrial laser scanning and quantitative structure models                                                       | Silva Fennica                                                  |
| 53. LaRue et al., 2020   | Compatibility of Aerial and Terrestrial LiDAR for Quantifying Forest Structural Diversity                                                         | Remote Sensing                                                 |
| 54. Lau et al., 2018     | Quantifying branch architecture of tropical trees using terrestrial LiDAR and 3D modelling                                                        | Trees - Structure and Function                                 |
| 55. Lau et al., 2019     | Estimating architecture-based metabolic scaling exponents of tropical trees using terrestrial LiDAR and 3D modelling                              | Forest Ecology and Management                                  |
| 56. Li et al., 2019      | Assessing revegetation effectiveness on an extremely degraded grassland, southern Qinghai-Tibetan Plateau, using terrestrial LiDAR and field data | Agriculture, Ecosystems and Environment                        |
| 57. Liang et al., 2018   | International benchmarking of terrestrial laser scanning approaches for forest inventories                                                        | ISPRS Journal of Photogrammetry and Remote Sensing             |
| 58. Maas et al., 2008    | Automatic forest inventory parameter determination from terrestrial laser scanner data                                                            | International Journal of Remote Sensing                        |
| 59. Magney et al., 2016  | LiDAR canopy radiation model reveals patterns of photosynthetic partitioning in an Arctic shrub                                                   | Agricultural and Forest Meteorology                            |
| 60. Moorthy et al., 2008 | Retrieving crown leaf area index from an individual tree using ground-based lidar data                                                            | Canadian Journal of Remote Sensing                             |

| Author (s), Year           | Title                                                                                                                                 | Journal                                                               |
|----------------------------|---------------------------------------------------------------------------------------------------------------------------------------|-----------------------------------------------------------------------|
| 61. Moorthy et al., 2019   | Semi-automatic extraction of liana stems from terrestrial LiDAR point clouds of tropical rainforests                                  | ISPRS Journal of Photogrammetry and Remote Sensing                    |
| 62. Moskal and Zheng, 2012 | Retrieving forest inventory variables with terrestrial laser scanning (TLS) in urban heterogeneous forest                             | Remote Sensing                                                        |
| 63. Muir et al., 2018      | Measuring plot scale woodland structure using terrestrial laser scanning                                                              | Remote Sensing in Ecology and Conservation                            |
| 64. Odipo et al., 2016     | Assessment of aboveground woody biomass dynamics using terrestrial laser scanner and L-band ALOS PALSAR data in South African Savanna | Forests                                                               |
| 65. Olivier et al., 2017   | A method to quantify canopy changes using multi-temporal terrestrial lidar data: Tree response to surrounding gaps                    | Agricultural and Forest Meteorology                                   |
| 66. Olofsson et al., 2014  | Tree stem and height measurements using terrestrial laser scanning and the RANSAC algorithm                                           | Remote Sensing                                                        |
| 67. Olsoy et al., 2014     | Aboveground total and green biomass of dryland shrub derived from terrestrial laser scanning                                          | ISPRS Journal of Photogrammetry and Remote Sensing                    |
| 68. Oveland et al., 2017   | Automatic estimation of tree position and stem diameter using a moving terrestrial laser scanner                                      | Remote Sensing                                                        |
| 69. Paynter et al., 2018   | Bounding uncertainty in volumetric geometric models for terrestrial lidar observations of ecosystems                                  | Interface Focus                                                       |
| 70. Pitkänen et al., 2019  | Measuring stem diameters with TLS in boreal forests by complementary fitting procedure.                                               | ISPRS Journal of Photogrammetry and Remote Sensing                    |
| 71. Popovas et al., 2017   | Individual tree parameters estimation from terrestrial laser scanner data                                                             | 10th International Conference on Environmental Engineering, ICEE 2017 |



| Author (s), Year                     | Title                                                                                                                                     | Journal                                                               |
|--------------------------------------|-------------------------------------------------------------------------------------------------------------------------------------------|-----------------------------------------------------------------------|
| 72. Putman et al., 2018              | Detecting and quantifying standing dead tree structural loss with reconstructed tree models using voxelized terrestrial lidar data        | Remote Sensing of Environment                                         |
| 73. Ravaglia et al., 2019            | Comparison of three algorithms to estimate tree stem diameter from terrestrial laser scanner data                                         | Forests                                                               |
| 74. Reddy et al., 2018               | Automatic estimation of tree stem attributes using terrestrial laser scanning in central Indian dry deciduous forests                     | Current Science                                                       |
| 75. Reddy et al., 2018               | Automatic Tree Identification and Diameter Estimation Using Single Scan Terrestrial Laser Scanner Data in Central Indian                  | Journal of the Indian Society of Remote Sensing                       |
| 76. Schulze-Brüninghoff et al., 2019 | Methods for LiDAR-based estimation of extensive grassland biomass                                                                         | Computers and Electronics in Agriculture                              |
| 77. Singh et al., 2018               | Variability in fire-induced change to vegetation physiognomy and biomass in semi-arid savanna                                             | Ecosphere                                                             |
| 78. Singh et al., 2020               | Moving from plot-based to hillslope-scale assessments of savanna vegetation structure with long-range terrestrial laser scanning (LR-TLS) | International Journal of Applied Earth Observation and Geoinformation |
| 79. Soma et al., 2020                | Mitigating occlusion effects in Leaf Area Density estimates from Terrestrial LiDAR through a specific kriging method                      | Remote Sensing of Environment                                         |
| 80. Srinivasan et al., 2014          | Multi-temporal terrestrial laser scanning for modeling tree biomass change                                                                | Forest Ecology and Management                                         |
| 81. Srinivasan et al., 2015          | Terrestrial laser scanning as an effective tool to retrieve tree level height, crown width, and stem diameter                             | Remote Sensing                                                        |

| Author (s), Year              | Title                                                                                                                       | Journal                                                                          |
|-------------------------------|-----------------------------------------------------------------------------------------------------------------------------|----------------------------------------------------------------------------------|
| 82. Stovall and Shugart, 2018 | Improved biomass calibration and validation with terrestrial lidar: Implications for future LiDAR and SAR missions          | IEEE Journal of Selected Topics in Applied Earth Observations and Remote Sensing |
| 83. Sun et al., 2015          | Retrieval and Accuracy Assessment of Tree and Stand Parameters for Chinese Fir Plantation Using Terrestrial Laser Scanning  | IEEE Geoscience and Remote Sensing Letters                                       |
| 84. Tan & Cheng, 2015         | Intensity data correction based on incidence angle and distance for terrestrial laser scanner                               | Journal of Applied Remote Sensing                                                |
| 85. Tan & Cheng, 2016         | Correction of incidence angle and distance effects on TLS intensity data based on reference targets                         | Remote Sensing                                                                   |
| 86. Tan et al., 2018          | Investigation of TLS intensity data and distance measurement errors from target specular reflections                        | Remote Sensing                                                                   |
| 87. Tansey et al., 2009       | Estimating tree and stand variables in a Corsican Pine woodland from terrestrial laser scanner data                         | International Journal of Remote Sensing                                          |
| 88. Tao et al., 2015          | Segmenting tree crowns from terrestrial and mobile LiDAR data by exploring ecological theories                              | ISPRS Journal of Photogrammetry and Remote Sensing                               |
| 89. Thies et al., 2004        | Three-dimensional reconstruction of stems for assessment of taper, sweep and lean based on laser scanning of standing trees | Scandinavian Journal of Forest Research                                          |
| 90. Tian et al., 2014         | Derivation of tree stem structural parameters from static terrestrial laser scanning data                                   | Lidar Remote Sensing for Environmental Monitoring XIV                            |
| 91. Vaaja et al., 2016        | the Effect of Wind on Tree Stem Parameter Estimation Using Terrestrial Laser Scanning                                       | ISPRS Annals of Photogrammetry, Remote Sensing and Spatial Information Sciences  |
| 92. Vaccari et al., 2013      | Bias in lidar-based canopy gap fraction estimates                                                                           | Remote Sensing Letters                                                           |
| 93. Vrlingie et al., 2013     | Shrub characterization using terrestrial laser scanning and implications for airborne LiDAR assessment                      | Canadian Journal of Remote Sensing                                               |

| Author (s), Year            | Title                                                                                                                    | Journal                                                                                                        |
|-----------------------------|--------------------------------------------------------------------------------------------------------------------------|----------------------------------------------------------------------------------------------------------------|
| 94. Wan et al., 2019        | Quantification of occlusions influencing the tree stem curve retrieving from single-scan terrestrial laser scanning data | Forest Ecosystems                                                                                              |
| 95. Wang et al., 2016       | Fast and robust stem reconstruction in complex environments using terrestrial laser scanning                             | International Archives of the Photogrammetry, Remote Sensing and Spatial Information Sciences - ISPRS Archives |
| 96. Wang et al., 2014       | A structure-aware global optimization method for reconstructing 3-D tree models from terrestrial laser scanning data     | IEEE Transactions on Geoscience and Remote Sensing                                                             |
| 97. Watt and Donoghue, 2005 | Measuring forest structure with terrestrial laser scanning                                                               | International Journal of Remote Sensing                                                                        |
| 98. Wu et al., 2018         | Estimation of forest trees diameter from terrestrial laser scanning point clouds based on a circle fitting method        | International Geoscience and Remote Sensing Symposium (IGARSS)                                                 |
| 99. Xi et al., 2016         | Automating plot-level stem analysis from terrestrial laser scanning                                                      | Forests                                                                                                        |
| 100. Xia et al., 2015       | Detecting stems in dense and homogeneous forest using single-scan TLS                                                    | Forests                                                                                                        |
| 101. Xiangyu et al., 2014   | 3D reconstruction of a single tree from terrestrial LiDAR data                                                           | International Geoscience and Remote Sensing Symposium (IGARSS)                                                 |
| 102. Xu et al., 2020)       | Estimation of degraded grassland aboveground biomass using machine learning methods from terrestrial laser scanning data | Ecological Indicators                                                                                          |
| 103. Yang et al., 2013      | Studying canopy structure through 3-D reconstruction of point clouds from full-waveform terrestrial lidar                | International Geoscience and Remote Sensing Symposium (IGARSS)                                                 |

| Author (s), Year            | Title                                                                                                                                            | Journal                                                                       |
|-----------------------------|--------------------------------------------------------------------------------------------------------------------------------------------------|-------------------------------------------------------------------------------|
| 104. Yang et al., 2013      | Three-dimensional forest reconstruction and structural parameter retrievals using a terrestrial full-waveform lidar instrument (Echidna®)        | Remote Sensing of Environment                                                 |
| 105. You et al., 2016       | Precise measurement of stem diameter by simulating the path of diameter tape from terrestrial laser scanning data                                | Remote Sensing                                                                |
| 106. Yrttimaa et al., 2019  | Investigating the feasibility of multi-scan terrestrial laser scanning to characterize tree communities in southern boreal forests               | Remote sensing                                                                |
| 107. Yu et al., 2013        | Stem biomass estimation based on stem reconstruction from terrestrial laser scanning point clouds                                                | Remote Sensing Letters                                                        |
| 108. Yurtseven et al., 2019 | Individual tree measurements in a planted woodland with terrestrial laser scanner                                                                | Turkish Journal of Agriculture and Forestry                                   |
| 109. Zhang et al., 2019     | A novel approach for the detection of standing tree stems from plot-level terrestrial laser scanning data                                        | Remote Sensing                                                                |
| 110. Zheng et al., 2013     | Retrieval of effective leaf area index in heterogeneous forests with terrestrial laser scanning                                                  | IEEE Transactions on Geoscience and Remote Sensing                            |
| 111. Zhou et al., 2018      | Estimation of the plot level forest parameters from Terrestrial Laser Scanning Data                                                              | IGARSS 2018 - 2018 IEEE International Geoscience and Remote Sensing Symposium |
| 112. Zhu et al., 2015       | 3D leaf water content mapping using terrestrial laser scanner backscatter intensity with radiometric correction                                  | ISPRS Journal of Photogrammetry and Remote Sensing                            |
| 113. Zimbres et al., 2020   | Savanna vegetation structure in the Brazilian Cerrado allows for the accurate estimation of aboveground biomass using terrestrial laser scanning | Forest Ecology and Management                                                 |
